# Supplementary material for: N-modified carbon-coated NaTi2(PO4)3 as an anode with high capacity and long lifetime for sodium-ion batteries
Source: Royal Society of Chemistry journal article supplement (doi:10.1039/d3cp00960b), 2023-01-01
Supplement: d3cp00960b1.pdf [file d3cp00960b1.pdf]

# N-modified Carbon-coated $\text{NaTi}_2(\text{PO}_4)_3$ as an Anode with High Capacity and Long Lifetime for Sodium-ion Batteries

Shuang Ding<sup>a</sup>, Huijin Li<sup>a</sup>, Jie Yuan<sup>b,\*</sup>, Xianli Yuan<sup>a</sup>, Min Li<sup>b</sup>

<sup>a</sup>College of Environmental and Chemical Engineering, Dalian University, Dalian, 116622, Liaoning, China

<sup>b</sup>School of Chemistry and Materials Engineering, Liupanshui Normal University, Liupanshui, 553004, Guizhou, China

\*Corresponding author: [yuanjieedu@163.com](mailto:yuanjieedu@163.com).

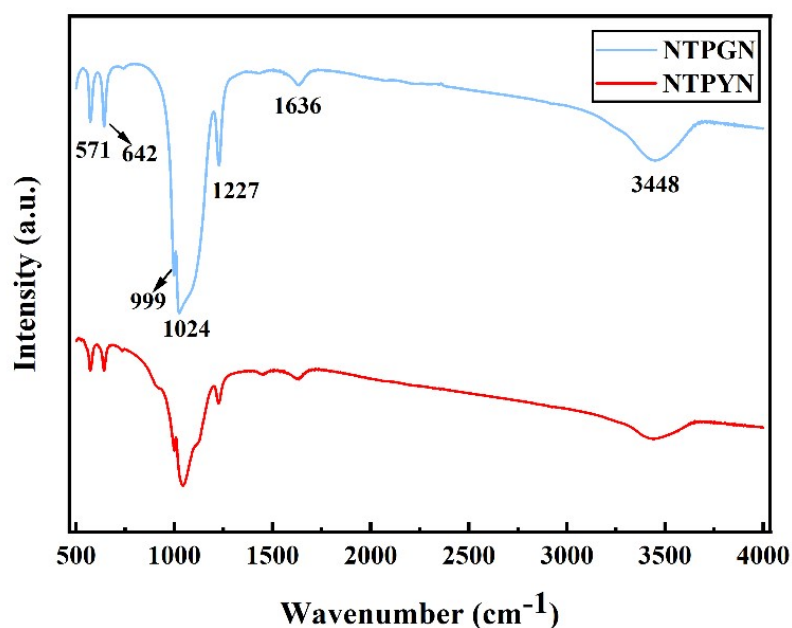

Fig. S1. FT-IR spectrum of NTPYN and NTPGN

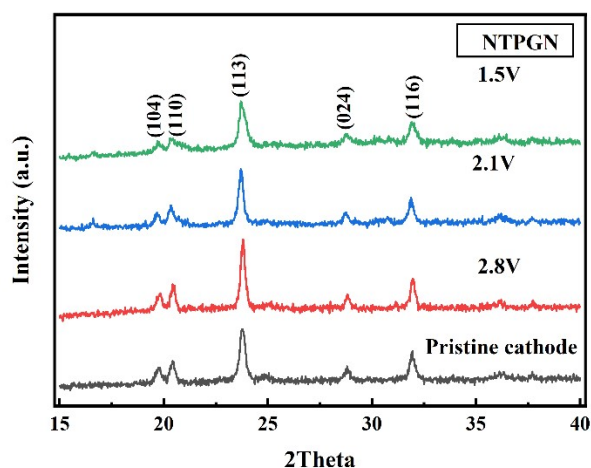

**Fig.S2.** ex-situ XRD patterns of the NTPGN half cells pristine cathode, during discharge and charge at 1C and a voltage range of 1.5-2.8 V after 3 cycles

**Tab.S1.** EIS fitting data of composites

|       | $R_s(\Omega)$ | $R_{ct}(\Omega)$ | Warburg( $\Omega \text{ cm}^{-2}$ ) |
|-------|---------------|------------------|-------------------------------------|
| NTPGN | 6.175         | 16.80            | 0.1081                              |
| NTPYN | 6.203         | 17.18            | 0.1329                              |

**Tab.S2.** Electrochemical properties of current representative  $\text{NaTi}_2(\text{PO}_4)_3$  materials for Na-ion battery

| materials                                                             | Capacity(mA h g <sup>-1</sup> ) | Cyclic stability                            |
|-----------------------------------------------------------------------|---------------------------------|---------------------------------------------|
| $\text{NaTi}_2(\text{PO}_4)_3$ / carbon nanofiber <sup>1</sup>        | 5C 104.7<br>10C 93.4            | 0.5C 20 cycles 99.6%<br>10C 20 cycles 92.6% |
| $\text{NaTi}_2(\text{PO}_4)_3$ /N-doped graphene <sup>2</sup>         | 0.1 C 129.3                     | 20C 200 cycles 88.6%                        |
| $\text{NaTi}_2(\text{PO}_4)_3/\text{C}^3$                             | 100C 108<br>50C 83              | 50C 6000 cycles 83%                         |
| MWNTs@ $\text{NaTi}_2(\text{PO}_4)_3$ <sup>4</sup>                    | 0.2C 97.4                       | 0.5C. 1000 cycles 76%                       |
| hollow $\text{NaTi}_2(\text{PO}_4)_3$ @rGO <sup>5</sup>               | 1C 124<br>3C 118                | 3C 500 cycles 99.8%                         |
| $\text{NaTi}_2(\text{PO}_4)_3$ @CNT <sup>6</sup>                      | 0.1C 127                        | 10 C 20 cycles 99.3 %                       |
| MWCNT/ $\text{NaTi}_2(\text{PO}_4)_3$ nanocrystals <sup>7</sup>       | 2C 101.7<br>50C 74.3            | 1C 200 cycles 88%                           |
| $\text{NaTi}_2(\text{PO}_4)_3$ @C nanocomposite <sup>8</sup>          | 0.1C 212<br>0.2C 187            | 20C 10000 cycles 68%                        |
| $\text{NaTi}_2(\text{PO}_4)_3$ Cubes/ Ti3C2 MXene <sup>9</sup>        | 0.1A g <sup>-1</sup> 208        | 1A g <sup>-1</sup> 2,000 cycles 74%         |
| $\text{NaTi}_2(\text{PO}_4)_3$ 3D graphene network <sup>10</sup>      | 1C 112<br>5C 105                | 10C 1000 cycles 80%                         |
| $\text{NaTi}_2(\text{PO}_4)_3$ -graphene nanocomposites <sup>11</sup> | 2C 110<br>5C 85                 | 2C 100 cycles 95.7%                         |

|                                                                                          |                      |                        |
|------------------------------------------------------------------------------------------|----------------------|------------------------|
| NaTi <sub>2</sub> (PO <sub>4</sub> ) <sub>3</sub> Microspheres/3D Graphene <sup>12</sup> | 0.1C 130             | 20 C 1000 cycles 77%   |
| NaTi <sub>2</sub> (PO <sub>4</sub> ) <sub>3</sub> /CMK-3 <sup>13</sup>                   | 0.2C 101             | 0.5C 1000 cycles 82.7% |
| NaTi <sub>2</sub> (PO <sub>4</sub> ) <sub>3</sub> /C <sup>14</sup>                       | 0.1C 125<br>1C 110   | 10C 120 cycles 82.4%   |
| mesoporous NaTi <sub>2</sub> (PO <sub>4</sub> ) <sub>3</sub> nanocrystals <sup>15</sup>  | 1C 125<br>30C 73     | 10C 5000 cycles 82%    |
| This work                                                                                | 1C 132.5<br>30C 98.2 | 20C 1,000 cycles 96%   |

## References

- 1 H. Liu and Y. Liu, 1D mesoporous NaTi<sub>2</sub>(PO<sub>4</sub>)<sub>3</sub>/carbon nanofiber: The promising anode material for sodium-ion batteries, *Ceramics International*, 2018, **44**, 5813–5816.
- 2 Y. Hu, X. Ma, P. Guo, F. Jaeger and Z. Wang, Design of NaTi<sub>2</sub>(PO<sub>4</sub>)<sub>3</sub> nanocrystals embedded in N-doped graphene sheets for sodium-ion battery anode with superior electrochemical performance, *Ceramics International*, 2017, **43**, 12338–12342.
- 3 Y. Jiang, J. Shi, M. Wang, L. Zeng, L. Gu and Y. Yu, Highly Reversible and Ultrafast Sodium Storage in NaTi<sub>2</sub>(PO<sub>4</sub>)<sub>3</sub> Nanoparticles Embedded in Nanocarbon Networks, *ACS Appl. Mater. Interfaces*, 2016, **8**, 689–695.
- 4 G. Pang, C. Yuan, P. Nie, J. Zhu, X. Zhang, H. Li and B. Ding, Design of nanoconfined MWNTs@NaTi<sub>2</sub>(PO<sub>4</sub>)<sub>3</sub> coaxial cables with superior rate capability and long-cycle life for Na-ion batteries, *Applied Materials Today*, 2016, **4**, 54–61.
- 5 S. Ye, Z. Li, T. Song, D. Cheng, Q. Xu, H. Liu and Y. Wang, Self-generated hollow NaTi<sub>2</sub>(PO<sub>4</sub>)<sub>3</sub> nanocubes decorated with graphene as a large capacity and long lifetime anode for sodium-ion batteries, *RSC Adv.*, 2017, **7**, 56743–56751.
- 6 M. Bian and L. Tian, Design and synthesis of three-dimensional NaTi<sub>2</sub>(PO<sub>4</sub>)<sub>3</sub>@CNT microspheres as advanced anode materials for rechargeable sodium-ion batteries, *Ceramics International*, 2017, **43**, 9543–9546.
- 7 G. B. Xu, L. W. Yang, X. L. Wei, J. W. Ding, J. X. Zhong and P. K. Chu, Hierarchical porous nanocomposite architectures from multi-wall carbon nanotube threaded mesoporous NaTi<sub>2</sub>(PO<sub>4</sub>)<sub>3</sub> nanocrystals for high-performance sodium electrodes, *Journal of Power Sources*, 2016, **327**, 580–590.
- 8 D. Wang, Q. Liu, C. Chen, M. Li, X. Meng, X. Bie, Y. Wei, Y. Huang, F. Du, C. Wang and G. Chen, NASICON-Structured NaTi<sub>2</sub>(PO<sub>4</sub>)<sub>3</sub>@C Nanocomposite as the Low Operation-Voltage Anode Material for High-Performance Sodium-Ion Batteries, *ACS Appl. Mater. Interfaces*, 2016, **8**, 2238–2246.
- 9 Q. Yang, T. Jiao, M. Li, Y. Li, L. Ma, F. Mo, G. Liang, D. Wang, Z. Wang, Z. Ruan, W. Zhang, Q. Huang and C. Zhi, *In situ* formation of NaTi<sub>2</sub>(PO<sub>4</sub>)<sub>3</sub> cubes on Ti<sub>3</sub>C<sub>2</sub>MXene for dual-mode sodium storage, *J. Mater. Chem. A*, 2018, **6**, 18525–18532.
- 10 C. Wu, P. Kopold, Y.-L. Ding, P. A. van Aken, J. Maier and Y. Yu, Synthesizing Porous NaTi<sub>2</sub>(PO<sub>4</sub>)<sub>3</sub> Nanoparticles Embedded in 3D Graphene Networks for High-Rate and Long Cycle-

- Life Sodium Electrodes, *ACS Nano*, 2015, **9**, 6610–6618.
- 11 G. Pang, C. Yuan, P. Nie, B. Ding, J. Zhu and X. Zhang, Synthesis of NASICON-type structured  $\text{NaTi}_2(\text{PO}_4)_3$ -graphene nanocomposite as an anode for aqueous rechargeable Na-ion batteries, *Nanoscale*, 2014, **6**, 6328–6334.
- 12 Y. Fang, L. Xiao, J. Qian, Y. Cao, X. Ai, Y. Huang and H. Yang, 3D Graphene Decorated  $\text{NaTi}_2(\text{PO}_4)_3$  Microspheres as a Superior High-Rate and Ultracycle-Stable Anode Material for Sodium Ion Batteries, *Adv. Energy Mater.*, 2016, **6**, 1502197.
- 13 G. Pang, P. Nie, C. Yuan, L. Shen, X. Zhang, H. Li and C. Zhang, Mesoporous  $\text{NaTi}_2(\text{PO}_4)_3$ /CMK-3 nanohybrid as anode for long-life Na-ion batteries, *J. Mater. Chem. A*, 2014, **2**, 20659–20666.
- 14 Z. Huang, L. Liu, L. Yi, W. Xiao, M. Li, Q. Zhou, G. Guo, X. Chen, H. Shu, X. Yang and X. Wang, Facile solvothermal synthesis of  $\text{NaTi}_2(\text{PO}_4)_3$ /C porous plates as electrode materials for high-performance sodium ion batteries, *Journal of Power Sources*, 2016, **325**, 474–481.
- 15 G. Xu, Z. Li, X. Wei, L. Yang and P. K. Chu, Monolithic Hierarchical Carbon Assemblies Embedded with Mesoporous  $\text{NaTi}_2(\text{PO}_4)_3$  Nanocrystals for Flexible High-Performance Sodium Anodes, *Electrochimica Acta*, 2017, **254**, 328–336.
